# Supplementary material
Source: publisher figshare collection journal article supplement (https://frontiersin.figshare.com/ndownloader/files/26759303)
Supplement: Supplementary file [file 26759303]

## *Supplementary Material*

### **R/G value – a numeric index of individual periodontal health and oral microbiome dynamics**

**Najmanova Lucie<sup>1†</sup>, Sabova Lenka<sup>1†</sup>, Lenartova Magdalena<sup>1,4</sup>, Janatova Tatjana<sup>2</sup>, Mysak Jaroslav<sup>2</sup>, Vetrovsky Tomas<sup>1</sup>, Tesinska Barbora<sup>1</sup>, Novotna Balikova Gabriela<sup>3</sup>, Koberska Marketa<sup>3</sup>, Broukal Zdenek<sup>2</sup>, Duskova Jana<sup>2</sup>, Podzimek Stepan<sup>2</sup>, Janata Jiri<sup>1,3\*</sup>**

<sup>1</sup>Institute of Microbiology v. v. i., Czech Academy of Sciences, Videnska 1083, 142 20 Prague, Czech Republic

<sup>2</sup> Institute of Dental Medicine, First Faculty of Medicine, Charles University and General University Hospital in Prague, Karlovo namesti 32, Prague 2, Czech Republic

<sup>3</sup> Institute of Microbiology v. v. i., BIOCEV, Czech Academy of Sciences, Prumyslova 595, 252 50 Vestec , Czech Republic

<sup>4</sup>Department of Genetics and Microbiology, Faculty of Science, Charles University, Prague, Czech Republic

**\* Correspondence:** Janata Jiri, [janata@biomed.cas.cz](mailto:janata@biomed.cas.cz)

<sup>†</sup>These authors contributed equally to this work

# 1 Supplementary Figures

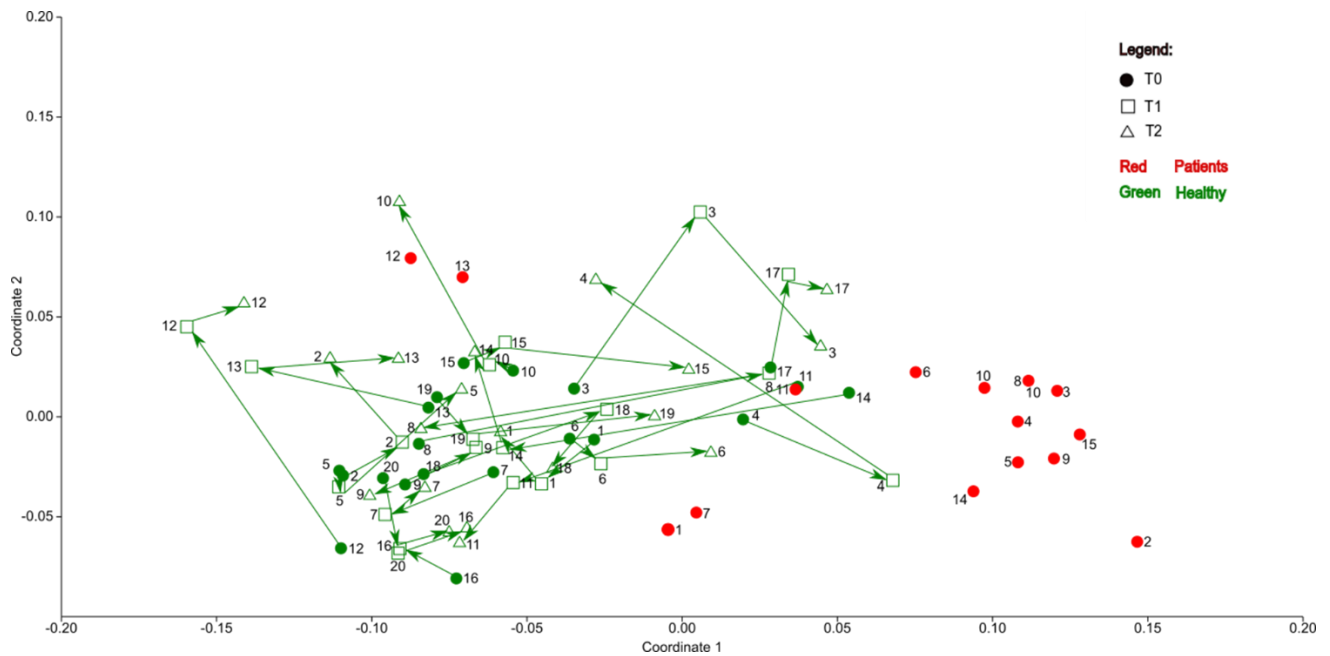

**Supplementary Figure 1.** Bray-Curtis distance based non-metric multidimensional scale analysis (NMDS) of full set of individual samples (20H + 15P) in all sampling times. The temporal samplings for each proband are connected with arrows.
